# Supplementary material for: Genome-wide identification of lipoxygenase gene family in cotton and functional characterization in response to abiotic stresses
Source: PubMed Central journal article supplement (PMC6085620; doi:10.1186/s12864-018-4985-2), 2018-08-09
Supplement: 12864_2018_4985_MOESM2_ESM.pdf [file 12864_2018_4985_MOESM2_ESM.pdf]

A representative 38 amino acids motif

A

|         |                                                                                  |     |
|---------|----------------------------------------------------------------------------------|-----|
| GaLOX2  | STNPFKP--SKQWITFPVDATTCWQWCLAKAHVCSNDGSGAHELIQHWLRTHACMEPFIIAARRHLSAMHPIKLLPHHR  | 580 |
| GaLOX3  | STNPFKP--SKQWITFPEDATSNWQWCLAKAHVCSNDGSGAHELIQHWLRTHACMEPFIIAARRHLSVMHPIKLLPHHR  | 580 |
| GaLOX5  | HTSPNSR--SKRWVTFPVDATTNWIWCLAKAHVCSNDGSGVHQLVNHWRTHACMEPFIIAARRHLSAMHPIKLLPHHR   | 612 |
| GaLOX11 | PTPSSNR--NKYVYTHGHDAITYYIWLAKAHVCANDAGVHQLANHWLRTHACMEPYIIATHRQLSSMHPIYKLLPHHR   | 605 |
| GaLOX1  | FMDGKQP--WKEAYRPSWHS SGVWLWCLAKAHVLAHDSGYHQLISHWLRTHCCTEPIIATNRQLSEMHPYRLLPHHR   | 606 |
| GaLOX4  | HPQGD SHGAVSKWFTPAVDGIEGSIWCLAKAHVAVNDSGYHQLISHWLRTHAVIEPFIASNRQLSVVHPIYKLLPHHR  | 562 |
| GaLOX6  | HPQGD SHGAVSKWFTPAEDGVGSSIWCLAKAHVAVNDSGYHQLVSHWLNTHAVIEPFIIAANRQLSVVHPIYKLLPHHR | 545 |
| GaLOX9  | HPDGDQLGAVSKWYTPTEHGVGSIWCLAKAHVAVNDSGVHQLISHWLNTHATMEPFIATNRQLSVVHPIYKLLPHHR    | 560 |
| GaLOX8  | KMEEDKIGCVNKWYTPAEHGVGSIWCLAKAHVAVNDSGYHQLVSHWLNTHAVLEPFIATNRQLSVVHPIYKLLPHHR    | 567 |
| GaLOX10 | KMEGDKIGCVSEWYTPAEHGVGSIWCLAKAHVAVNDSGYHQLVSHWLNTHAVLEPFIATNRQLSVVHPYKLLPHHR     | 566 |
| GaLOX7  | GSSNVVDGKMTMLLPEKEDIQALWCLAKAHVAANDSAYHQLISHWLRTHAVVEPFIATRQLSVVMHPVERLLPHHR     | 545 |

B

|                      |                                              |     |
|----------------------|----------------------------------------------|-----|
| G <sub>r</sub> LOX6  | NDSGYHQLISHWLRTHAVIEPFIASNRQLSVVHPIYKLLPHHR  | 572 |
| G <sub>r</sub> LOX9  | NDSGYHQLVSHWLNTHAVIEPFIATNRQLSVVHPIYKLLPHHR  | 595 |
| G <sub>r</sub> LOX14 | NDSGYHQLISHWLNTHATMEPFIATNRQLSVVHPIYKLLPHHR  | 565 |
| G <sub>r</sub> LOX4  | NDSGYHQLVSHWLNTHAVIEPFIATNRQLSVVHPIYKLLPHHR  | 556 |
| G <sub>r</sub> LOX5  | NDSGYHQLVSHWLNTHAVIEPFIATNRQLSAVHPVYKLLPHHR  | 571 |
| G <sub>r</sub> LOX3  | VDTGFHQLISHWLNTHAAIEPFIATNRQLSVVHPIYKLLPHHR  | 524 |
| G <sub>r</sub> LOX1  | NDSAHQLISHWLRTHAVVEPFIATRQLSVMHPIHRLDPHHR    | 547 |
| G <sub>r</sub> LOX2  | HDAGYHQIVSHCLRTHCVTEPIIATNRQLSVMHPIYRLLPHHR  | 391 |
| G <sub>r</sub> LOX10 | HDAGYHQLISHWLRTHCCTEPIIATNRQLSEMHPYRLLPHHR   | 601 |
| G <sub>r</sub> LOX7  | NDAGYHQLVNHWRTHACMEPYIIATHRQLSSMHPIYKLLPHHR  | 610 |
| G <sub>r</sub> LOX11 | NDSGAHELIQHWLRTHACMEPFIIAARRHLSAMHPVLLPHHR   | 585 |
| G <sub>r</sub> LOX12 | NDSGAHELIQHWLRTHACMEPFIIAARRHLSVMHPIHLLPHHR  | 585 |
| G <sub>r</sub> LOX8  | NDAGYHQLISHWLRTHACLEPFIIAARRHLSVMHPIYKLLPHHR | 609 |
| G <sub>r</sub> LOX13 | NDAGYHQLVNHWRTHACMEPFIIAARRHLSAMHPIKLLPHHR   | 617 |

C

|         |                                                              |     |
|---------|--------------------------------------------------------------|-----|
| GbLOX1  | SGVWLWCLAKAHVLAHDSGYHQLISHWLRTHCCTEPIIATNRQLSEMHPYRLLPHHR    | 606 |
| GbLOX3  | SGVWLWCLAKAHVLAHDSGYHQLISHWLRTHCCTEPIIATNRQLSEMHPYRLLPHHR    | 613 |
| GbLOX6  | TTYWIWCLAKAHVCANDAGVHQLVNHWRTHACMEPYIIATHRQLSSMHPIYKLLPHHR   | 615 |
| GbLOX12 | TTYWIWCLAKAHVCANDAGVHQLVNHWRTHACMEPYIIATHRQLSSMHPIYKLLPHHR   | 615 |
| GbLOX9  | TTNWIWCLAKAHVCSNDGSGVHQLVNHWRTHACMEPFIIAARRHLSAMHPIKLLPHHR   | 622 |
| GbLOX10 | TTNWIWCLAKAHVCSNDGSGVHQLVNHWRTHACMEPFIIAARRHLSAMHPIKLLPHHR   | 622 |
| GbLOX17 | TSNWQWCLAKAHVCSNDGSGAHELIQHWLRTHACMEPFIIAARRHLSVMHPIHLLPHHR  | 548 |
| GbLOX18 | TTCWQWCLAKAHVCSNDGSGAHELIQHWLRTHACMEPFIIAARRHLSAMHPIKLLPHHR  | 372 |
| GbLOX11 | TTCWQWCLAKAHVCSNDGSGAHELIQHWLRTHACLEPFIIAARRHLSVMHPIYKLLPHHR | 614 |
| GbLOX2  | VGSSIWCLAKAYAAVNDSGYHQLVSHWLNTHAVIEPFIIAANRQLSVVHPIYKLLPHHR  | 573 |
| GbLOX4  | VGSSIWCLAKAYAAVNDSGYHQLVSHWLNTHAVIEPFIIAANRQLSVVHPIYKLLPHHR  | 573 |
| GbLOX16 | IEGSIWCLAKAYAAVNDSGYHQLISHWLRTHAVIEPFIASNRQLSVVHPIYKLLPHHR   | 357 |
| GbLOX5  | VEGSIWCLAKAYAAVNDSGYHQLISHWLNTHAVIEPFIATNRQLSVVHPIYKLLPHHR   | 900 |
| GbLOX15 | VEGSIWCLAKAYAAVNDSGYHQLISHWLNTHATMEPFIATNRQLSVVHPIYKLLPHHR   | 570 |
| GbLOX7  | VEGSIWCLAKAYAAVNDSGYHQLVSHWLNTHAVLEPFIATNRQLSVVHPVYKLLPHHR   | 576 |
| GbLOX13 | VEGSIWCLAKAYAAVNDSGYHQLVSHWLNTHAVLEPFIATNRQLSVVHPVYKLLPHHR   | 584 |
| GbLOX8  | VEGSIWCLAKAYAAVNDSGYHQLVSHWLNTHAVIEPFIATNRQLSVVHPIYKLLPHHR   | 577 |
| GbLOX14 | VEGSIWCLAKAYAAVNDSGYHQLVSHWLNTHAVLEPFIATNRQLSVVHPIYKLLPHHR   | 577 |

D

|         |                                                      |     |
|---------|------------------------------------------------------|-----|
| GhLOX9  | LAKAHVCSNDGSGYHQLVNHWRTHACMEPFIIAARRHLSAMHPIKLLPHHR  | 635 |
| GhLOX20 | LAKAHVCSNDGSGYHQLVNHWRTHACMEPFIIAARRHLSAMHPIKLLPHHR  | 430 |
| GhLOX15 | LAKAHVCSNDGSGAHELIQHWLRTHACMEPFIIAARRHLSAMHPIKLLPHHR | 603 |
| GhLOX4  | LAKAHVCSNDGSGAHELIQHWLRTHACMEPFIIAARRHLSAMHPIKLLPHHR | 614 |
| GhLOX14 | LAKAHVCSNDGSGAHELIQHWLRTHACMEPFIIAARRHLSAMHPIKLLPHHR | 372 |
| GhLOX5  | LAKAHVCSNDGSGAHELIQHWLRTHACMEPFIIAARRHLSAMHPIKLLPHHR | 304 |
| GhLOX18 | LGAHVCSNDGSGYHQLISHWLRTHACMEPFIIAARRHLSAMHPIKLLPHHR  | 627 |
| GhLOX12 | LAKAHVCANDAGVHQLANHWLRTHACMEPYIIATHRQLSSMHPIYKLLPHHR | 628 |
| GhLOX2  | LAKAHVCANDAGVHQLANHWLRTHACMEPYIIATHRQLSSMHPIYKLLPHHR | 628 |
| GhLOX13 | LAKAHVLAHDSGYHQLISHWLRTHCCTEPIIATNRQLSEMHPYRLLPHHR   | 619 |
| GhLOX3  | LAKAHVLAHDSGYHQLISHWLRTHCCTEPIIATNRQLSEMHPYRLLPHHR   | 517 |
| GhLOX21 | LAKAHVAVNDSGYHQLISHWLNTHAVIEPFIATNRQLSVVHPIYKLLPHHR  | 583 |
| GhLOX10 | LAKAHVAVNDSGYHQLISHWLNTHAVIEPFIATNRQLSVVHPIYKLLPHHR  | 583 |
| GhLOX11 | LAKAHVAVNDSGYHQLISHWLNTHAVIEPFIATNRQLSVVHPIYKLLPHHR  | 590 |
| GhLOX1  | LAKAHVAVNDSGYHQLISHWLNTHAVIEPFIATNRQLSVVHPIYKLLPHHR  | 590 |
| GhLOX19 | LAKAHVAVNDSGYHQLISHWLNTHAVIEPFIATNRQLSVVHPIYKLLPHHR  | 568 |
| GhLOX8  | LAKAHVAVNDSGYHQLISHWLNTHAVIEPFIATNRQLSVVHPIYKLLPHHR  | 592 |
| GhLOX6  | LAKAHVAVNDSGYHQLISHWLNTHAVIEPFIATNRQLSVVHPIYKLLPHHR  | 591 |
| GhLOX17 | LAKAHVAVNDSGYHQLISHWLNTHAVIEPFIATNRQLSVVHPIYKLLPHHR  | 599 |
| GhLOX7  | LAKAHVAVNDSGYHQLISHWLNTHAVIEPFIATNRQLSVVHPVYKLLPHHR  | 590 |
| GhLOX16 | LAKAHVAVNDGSGYHQLISHWLNTHAAIEPFIATNRQLSVVHPIYKLLPHHR | 518 |
