# Supplementary material for: Genome-wide identification of lipoxygenase gene family in cotton and functional characterization in response to abiotic stresses
Source: PubMed Central journal article supplement (PMC6085620; doi:10.1186/s12864-018-4985-2), 2018-08-09
Supplement: 12864_2018_4985_MOESM7_ESM.pdf [file 12864_2018_4985_MOESM7_ESM.pdf]

**A**

|         |                                                                                   |     |
|---------|-----------------------------------------------------------------------------------|-----|
| GaLOX2  | YTMDINARARELLISAGGIIESLFFSTKECSMEITSFAYKN-WRFDMESLPADLIRRGVAVLDPTEPHGIK-LIEDYPYA  | 658 |
| GaLOX3  | YTMDINARARELLINADGIIIESLFFSTKECSMEITSLAYKN-WRFDMESLPADLIRRGIAEQDTEPHGIK-LIEDYPYA  | 658 |
| GaLOX5  | YTLEINALARQSLISADGVIENCFTPGRYCMEMSAAAYRSHWRFDKLEGLPADLIRRGIAVDFDTPQPHGLK-LIEDYPYA | 691 |
| GaLOX11 | YTLEINALARQSLINGGGIIEASFSPGKYAMELSAAAYES-WRFDRALPADLIRGMAVDFDPSAPGGLK-LIEDYPYA    | 683 |
| GaLOX1  | YTMEINALAREYLINADGIIETSFSFGKYSMEICSVAYDLLWRFDHEALPADLIRGMAVDFDPAPHGLR-LTIKDYPIA   | 685 |
| GaLOX4  | DTMNINALARQILINAGGVLELTVFPGKYAMEMSASFVYKN-WVFTDQALPVDLIRGMAVDRSSCPFGK-LIEDYPYA    | 640 |
| GaLOX6  | DTMNINALARQTLINAGGVLELTVFPGKYALEMSSAIYRN-WVFTEQALPVDLIRGMAVDFDSSCPYGLK-LMINDYPYA  | 623 |
| GaLOX9  | DTMNINAFARQILINAGGVLELTVFPGKYAMEMSSIIYKS-WNFLDQALPRLNLMKRGVAVDDKSSPNGLR-LTIKDYPIA | 638 |
| GaLOX8  | DTMTINALARELLINANGIIEKTEFCPGKYSLEMSSVIYKS-WNFMDQALPNDLKKRGIADGDIKSLDDLDRLLIKDYPIA | 646 |
| GaLOX10 | DTMTINALARELLINANGIIEKTEFCPGKYSLEMSSVIYKS-WNFIDQALPNNLKKRGIADGDIKSLDDLDRLLIKDYPIA | 645 |
| GaLOX7  | DTMHINALARVTLINAGGILEKTLFTGKFSMELSSSELYKQ-WRFDEQALPSDLIRKMALEESENPRGAL-MLFQDYPYG  | 623 |

**B**

|         |                                                     |     |
|---------|-----------------------------------------------------|-----|
| GrLOX6  | NALARQILINAGGVLELTVFPGKYAMEMSASFVYKN-WVFTDQALPVDLIK | 621 |
| GrLOX9  | NALARQTLINAGGVLELTVFPGKYALEMSSAIYRN-WVFTDQALPVDLIK  | 644 |
| GrLOX14 | NAFARQILINGGGVLELTVFPGKYAMEMSSVIYKS-WNLLDQALPRDLKK  | 614 |
| GrLOX4  | NALARELLINANGIIEGTEFCPGKYSLEMSSVIYKS-WNFMDQALPNDLKK | 605 |
| GrLOX5  | NALARELLINANGIIEKTEFCPGKYSLEMSSVIYKS-WNFMDQALPNDLKK | 620 |
| GrLOX3  | NALAREVLVNAGGVLETTFTYTGQYSMEMSSVIYRS-WNFMEQSLPNDLKK | 573 |
| GrLOX1  | NALAREVLINAGGILEKTLFTGKFSMELSSSELYKQ-WRFDEQALPSDLIK | 596 |
| GrLOX2  | NALARESLINADGIIENSESPGKYSLELCAVAYDLEWRFDHQALPADLIS  | 441 |
| GrLOX10 | NALARAYLINADGIIETSFSFGKYSMEICSVAYDLLWRFDHEALPADLIS  | 651 |
| GrLOX7  | NALARQSLINGGGIIEASFSPGKYAMELSAAAYES-WRFDRALPADLIH   | 659 |
| GrLOX11 | NARARELLVSAGGIIESLFFSTKECSMEITSFAYKN-WRFDMESLPADLIR | 634 |
| GrLOX12 | NARARELLINADGIIESFFSTKECSMEITSLAYKN-WRFDMESLPADLIR  | 634 |
| GrLOX8  | NAQGRQLLLNAGGIIESHFFTAACSMEEVSASVYQNWWRFDMESLPADLIR | 659 |
| GrLOX13 | NALARQSLICADGVIENCFTPGRYCMEMSAAAYRSHWRFDKLEGLPADLIR | 667 |

**C**

|         |                                                      |     |
|---------|------------------------------------------------------|-----|
| GbLOX1  | TNRQLSEMHPIYRLLHHPHERYTMEINALARAYLINADGIIETSFSFGKYS  | 626 |
| GbLOX3  | TNRQLSEMHPIYRLLHHPHERYTMEINALAREYLINADGIIETSFSFGKYS  | 633 |
| GbLOX6  | THRQLSMHPIYKLLHHPHMRYTLEINALARQSLINGGGIIEASFSPGKYA   | 635 |
| GbLOX12 | THRQLSMHPIYKLLHHPHMRYTLEINALARQSLINGGGIIEASFSPGKYA   | 635 |
| GbLOX9  | AHRQLSAMHPIFKLLDPHMRYTLEINALARQSLICADGVIENCFTPGRYC   | 642 |
| GbLOX10 | AHRQLSAMHPIFKLLDPHMRYTLEINALARQSLISADGVIENCFTPGRYC   | 642 |
| GbLOX17 | ARRHLSVMHPIHKKLLHHPHMRYTMDINARARELLINADGIIESFFSTKECS | 568 |
| GbLOX18 | ARRHLSAMHPIKLLHHPHMRYTMDINARARELLVSAGGIIESLFFSTKECS  | 392 |
| GbLOX11 | AHRQLSAMHPIYKLLHCHMRYTMDVNAQGRQLLLNAGGIIESHFFTAACS   | 634 |
| GbLOX2  | ANRQLSVVHPIYKLLHHPHERDTMNINALARQTLINAGGVLELTVFPGKYA  | 593 |
| GbLOX4  | ANRQLSVVHPIYKLLHHPHERDTMNINALARQTLINAGGVLELTVFPGKYA  | 593 |
| GbLOX16 | SNRQLSVVHPIYKLLHHPHERDTMNINALARQILINAGGVLELTVFPGKYA  | 377 |
| GbLOX5  | TNRQLSVVHPIYKLLYVHHERDTMNINAFARQILINGGGVLELTVFPGKYA  | 920 |
| GbLOX15 | TNRQLSVVHPIYKLLYVHHERDTMNINAFARQILINGGGVLELTVFPGKYA  | 590 |
| GbLOX7  | TNRQLSVVHPVYKLLHHPHERDTMTINALARELLINANGIIEKTEFCPGKYS | 596 |
| GbLOX13 | TNRQLSVVHPVYKLLHHPHERDTMTINALARELLINANGIIEKTEFCPGKYS | 604 |
| GbLOX8  | TNRQLSVVHPIYKLLHHPHERDTMTINALARELLINANGIIEKTEFCPGKYS | 597 |
| GbLOX14 | TNRQLSVVHPIYKLLHHPHERDTMTINALARELLINANGIIEKTEFCPGKYS | 597 |

**D**

|         |                                                   |     |
|---------|---------------------------------------------------|-----|
| GhLOX9  | FTFGRYCMEMSAAAYRSHWRFDKLEGLPADLIR                 | 667 |
| GhLOX20 | FTFGRYCMEMSAAAYRSHWRFDKLEGLPADLIR                 | 462 |
| GhLOX15 | FSTKECSMEITSFAYKN-WRFDMESLPADLIR                  | 634 |
| GhLOX4  | FSTKECSMEITSFAYKN-WRFDMESLPADLIR                  | 645 |
| GhLOX14 | FSTKECSMEITSLAYKN-WRFDMESLPADLIR                  | 403 |
| GhLOX5  | FSTKECSMEITSLAYKN-WRFDMESLPADLIR                  | 335 |
| GhLOX18 | FFTAACSMEEVSASVYQNWWRFDMESLPADLIR                 | 659 |
| GhLOX12 | FSPGKYAMELSAAAYES-WRFDRALPADLIH                   | 659 |
| GhLOX2  | FSPGKYAMELSAAAYES-WRFDRALPADLIH                   | 659 |
| GhLOX13 | FSPGKYSMEICSVAYDLLWRFDHEALPADLISRYLESAFPDIENFTANN | 669 |
| GhLOX3  | FSPGKYSMEICSVAYDLLWRFDHEALPADLIS                  | 549 |
| GhLOX21 | VFPGKYAMEMSSVIYKS-WNLLDQALPRDLKK                  | 614 |
| GhLOX10 | VFPGKYAMEMSSIIYKS-WNFLDQALPRDLKK                  | 614 |
| GhLOX11 | VFPGKYAMEMSASFVYKN-WVFTDQALPVDLIK                 | 621 |
| GhLOX1  | VFPGKYAMEMSASFVYKN-WVFTDQALPVDLIK                 | 621 |
| GhLOX19 | VFPGKYALEMSSAIYRN-WVFTEQALPVDLIK                  | 599 |
| GhLOX8  | VFPGKYALEMSSAIYRN-WVFTEQALPVDLVK                  | 623 |
| GhLOX6  | FSPGKYSLEMSSVIYKS-WNFMDQALPNDLKK                  | 622 |
| GhLOX17 | FSPGKYSLEMSSVIYKS-WNFMDQALPNDLKK                  | 630 |
| GhLOX7  | FSPGKYSLEMSSVIYKS-WNFIDQALPNNLKK                  | 621 |
| GhLOX16 | FYTGQYSMEMSSVIYRS-WNFMEQSLPNDLKK                  | 549 |
