# Supplementary material for: Genome-wide identification of lipoxygenase gene family in cotton and functional characterization in response to abiotic stresses
Source: BMC Genomics. 2018 Aug 9;19:599. doi: 10.1186/s12864-018-4985-2 (PMC6085620; doi:10.1186/s12864-018-4985-2)
Supplement: Supplementary file 4 — Table S3. Chromosomal location of LOX gene family in four species of cotton. (XLSX 11 kb) [file 12864_2018_4985_MOESM4_ESM.xlsx]

## Sheet: Sheet1
G. arboretum	Chr.	Start	End
GaLOX1	Ga04	34028421	34039179
GaLOX2	Ga07	14341675	14345424
GaLOX3	Ga07	14351921	14356069
GaLOX4	Ga05	58006544	58010294
GaLOX5	Ga09	65196864	65200729
GaLOX6	Ga11	8688034	8691217
GaLOX7	Chr01	128210622	128213886
GaLOX8	Ga03	61652283	61655588
GaLOX9	Ga10	78870989	78871387
GaLOX10	Ga03	11144612	11148551
GaLOX11	Ga05	39877267	39881312
G. raimondii
GrLOX1
GrLOX2	Gr04	12840277	12843742
GrLOX3	Gr04	57889451	57894846
GrLOX4	Gr04	57924131	57927437
GrLOX5	Gr04	57956627	57960603
GrLOX6	Gr05	3997392	4001623
GrLOX7	Gr05	49794001	49798466
GrLOX8	Gr06	32143080	32152310
GrLOX9	Gr06	48566094	48569901
GrLOX10	Gr09	5035679	5047177
GrLOX11	Gr10	62070256	62074021
GrLOX12	Gr10	62075953	62080427
GrLOX13	Gr11	4927869	4932273
GrLOX14	Gr13	32225541	32229781
G. hirsutum
GhLOX1	GhA02	3523655	3527420
GhLOX2	GhA03	80960551	80964598
GhLOX3	GhA05	5911338	5919998
GhLOX4	GhA06	102961944	102965577
GhLOX5	GhA06	102972001	102974915
GhLOX6	GhA08	99332739	99336038
GhLOX7	GhA08	99353050	99356968
GhLOX8	GhA09	19668	22851
GhLOX9	GhA10	5507914	5511754
GhLOX10	GhA13	46120284	46123952
GhLOX11	GhD02	4790534	4794274
GhLOX12	GhD02	53404743	53408787
GhLOX13	GhD05	5489544	5499749
GhLOX14	GhD06	63519944	63526448
GhLOX15	GhD06	63528632	63532396
GhLOX16	GhD08	61788663	61865296
GhLOX17	GhD08	61878890	61882189
GhLOX18	GhD09	30916858	30925731
GhLOX19	GhD09	48148573	48151751
GhLOX20	GhD10	63219	69963
GhLOX21	GhD13	33398610	33402244
